# Supplementary material
Source: ML conference proceedings conference paper supplement (https://openreview.net/forum?id=T47mUw8pW4)
Supplement: supplementary_material [file attachment]

---

# Supplementary material to the article: The medial axis of closed bounded sets is Lipschitz stable with respect to the Hausdorff distance under ambient diffeomorphisms

---

Anonymous Author(s)

Affiliation

Address

email

## 1 A Proofs

2 *Proof of Lemma 3.3* We first note that the statement is empty if  $v = 0$ . Let  $v \neq 0$ , and consider the  
3 nested family of balls  $B(p + \lambda'v, \lambda'|v|)$ , parametrized by  $\lambda' > 0$ .

4 Because  $\pi_S(p + \lambda v) \neq p$ , the (closed) ball  $B(p + \lambda v, \lambda|v|)$  contains a point  $q \in S$  other than  $p$ .  
5 Since the balls  $B(p + \lambda'v, \lambda'|v|)$  are nested, the point  $q$  lies inside every ball  $B(p + \lambda'v, \lambda'|v|)$  with  
6  $\lambda' \geq \lambda$ . Moreover,  $q$  lies in the interior of  $B(p + \lambda'v, \lambda'|v|)$  for  $\lambda' > \lambda$ . Hence, for every  $\lambda' \geq \lambda$ , we  
7 have that  $\pi_S(p + \lambda'v) \neq \{p\}$  and for  $\lambda' > \lambda$ , that  $p \notin \pi_S(p + \lambda'v)$ .  $\square$

8 *Proof of Lemma 3.7* Let  $Q = \pi_S(x)$  be the subset of  $S$  that is closest to  $x$ . Because  $x \in \text{ax}(S)$ ,  
9  $Q$  contains at least two points, one of them being  $p$ . We write  $\lambda = |x - p|$ . Since  $S$  and  $\text{ax}(S)$  are  
10 disjoint,  $\lambda > 0$ , and thus we can define  $u = \frac{x-p}{\lambda}$ .

11 Since the interior of the ball  $B(x, \lambda)$  does not intersect  $S$ , it in particular does not intersect  $\text{Tan}(p, S)$   
12 and thus  $B(x, \lambda)$  is weakly tangent at  $p$  by Remark 3.2. Let us now consider the nested family  
13  $B(p + \lambda'u, \lambda')$  of weakly tangent balls at  $p$ . By definition,  $\partial B(x, \lambda) \cap S = Q$  and therefore  
14  $B(p + \lambda'u, \lambda') \cap S = \{p\}$  for  $\lambda' < \lambda$ . At the same time, Lemma 3.3 yields that for  $\lambda' > \lambda$ ,  
15  $p \notin \pi_S(p + \lambda'u)$ . Hence the projection range in direction  $u$  equals  $d(p, u, \pi_S) = \lambda$  and we obtain  
16  $\pi_{\text{ax}, S}(p, u) = p + \lambda u = x$  directly from Definition 3.6. The fact that  $\pi_{\text{ax}, S}(\text{UBP}(S)) \subseteq \overline{\text{ax}(S)}$  is  
17 due to Lemma 2.3  $\square$

18 The next two claims are used in the proof of Theorem 3.9:

### Claim A.1

$$u' = \frac{(D_p F^t)^{-1}(u)}{|(D_p F^t)^{-1}(u)|}, \quad (8)$$

19 where  $D_p F^t$  is the transpose matrix (or the adjoint operator) of  $DF$  at the point  $p$ , defined by

$$\forall v_1, v_2, \quad \langle v_1, D_p F(v_2) \rangle = \langle D_p F^t(v_1), v_2 \rangle.$$

20 *Proof*

$$\begin{aligned} w \in D_p F(u^\perp) &\iff \langle D_p F^{-1}(w), u \rangle = 0 \\ &\iff \langle w, (D_p F^{-1})^t u \rangle = 0 \\ &\iff \langle w, u' \rangle = 0 \\ &\iff w \in u'^\perp, \end{aligned}$$

21 and thus

$$D_p F(u^\perp) = u'^\perp. \quad (9)$$

22 In other words, we have shown that  $u'$  is orthogonal to  $D_p F(u^\perp) = D_p F(T)$ .

23 Because

$$\langle D_p F(u), (D_p F^{-1})^t(u) \rangle = \langle D_p F^{-1}(D_p F(u)), u \rangle = \langle u, u \rangle > 0,$$

24 we deduce that  $\langle D_p F(u), u' \rangle > 0$ . This is in turn equivalent to  $u'$  pointing towards the interior of  
25  $F(B(c, \rho))$ .  $\square$

26 **Claim A.2** Let  $\|D_p F - \text{Id}\| \leq \varepsilon < 1$ . Then the angle  $\angle u, u'$  between the vectors  $u$  and  $u'$  satisfies

$$\cos \angle u, u' \geq \sqrt{1 - \varepsilon^2}.$$

27 *Proof* We first show that  $\angle u, u' < \pi/2$ . Indeed, define the vector  $w$  as

$$w = (D_p F^t)^{-1}(u),$$

28 that is, the vector satisfying  $u = D_p F^t(w)$ . Then  $u' = \frac{w}{|w|}$  (see equation (8)), and

$$\begin{aligned} |w| \langle u, u' \rangle &= \langle u, w \rangle = \langle D_p F^t w, w \rangle \\ &= \langle w, D_p F w \rangle = |w|^2 + \langle w, (D_p F - \text{Id})w \rangle \\ &\geq |w|^2 - |w|^2 \|D_p F - \text{Id}\| \\ &> 0. \end{aligned} \quad (\text{because, by assumption, } \|D_p F - \text{Id}\| < 1)$$

29 Thus,  $\langle u, u' \rangle > 0$ , and therefore  $\angle u, u' < \pi/2$ .

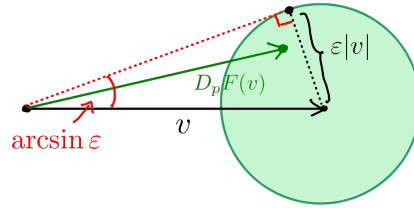

Figure 6: Since  $\|v - D_p F(v)\| \leq \varepsilon |v|$ , the vector  $D_p F(v)$  lies in the green ball  $B(v, \varepsilon |v|)$ . Since  $\varepsilon < 1$ , the angle between  $v$  and  $D_p F(v)$  is upper-bounded by  $\arcsin \varepsilon < \pi/2$ .

30 Furthermore, consider a vector  $v \in u^\perp$ . Since  $\|v - D_p F(v)\| \leq \|D_p F - \text{Id}\| \|v\| \leq \varepsilon |v|$ , the angle  
31 between  $v$  and  $D_p F(v)$  is upper-bounded by  $\arcsin \varepsilon < \pi/2$ , as illustrated in Figure 6. This yields a  
32 bound on the angle between the tangent spaces  $u^\perp$  and  $D_p F(u^\perp)$ :

$$\sin \angle u^\perp, D_p F(u^\perp) = \sin \sup_{v \in u^\perp, w \in D_p F(u^\perp)} \angle v, w \leq \varepsilon. \quad (10)$$

33 Using (9) and (10) we deduce that:

$$\sin \angle u, u' = \sin \angle u^\perp, u'^\perp \leq \varepsilon.$$

34 Finally, since  $\angle u, u' < \pi/2$ ,  $\cos \angle u, u' \geq \sqrt{1 - \varepsilon^2}$ . This concludes the proof.  $\square$

35 *Proof of Theorem 3.9* We first derive the bounds for the radius  $\rho'$ . As the first step, we apply  
36 Theorem 2.6 to the boundary sphere  $S(c, \rho)$  of the maximal empty weakly tangent ball  $B(c, \rho)$ . In  
37 particular, we can choose the constant  $s$  in Theorem 2.6 arbitrarily large, and the constant  $t$  arbitrarily  
38 close to the reach  $\text{rch}(S(c, \rho)) = \rho$ , to obtain:

$$\text{rch}(F(S(c, \rho))) \geq \frac{1}{\left(\frac{L_F}{\rho} + L_{DF}\right)(L_F)^2} = \frac{\rho}{(L_F)^3 + \rho L_{DF}(L_F)^2} =: \rho_1.$$

39 This means that no open ball of radius  $\rho_1$  tangent to the set  $F(S(c, \rho))$  actually intersects  $F(S(c, \rho))$ .  
40 In addition, since the set  $F(B(c, \rho))$  does not contain any points of  $F(S)$  in its interior, no ball of

radius  $\rho_1$  that is tangent to  $F(S(c, \rho))$  and whose centre lies inside  $F(S(c, \rho))$  contains any point of  $F(S)$ .

The unit vector  $u' \in DF_p(T)^\perp$  (defined in (8)) is defined such that the point  $F(p) + \rho_1 u'$  lies inside the distorted ball  $F(B(c, \rho))$ . Due to the above observation, the ball  $B(F(p) + \rho_1 u', \rho_1)$  is weakly tangent to  $F(S)$  at  $F(p)$  and contains no points of  $F(S)$  in its interior.

Let us now consider the weakly tangent ball  $B(F(p) + \rho'' u', \rho'')$ , whose radius  $\rho''$  satisfies

$$\rho'' > \frac{(L_F)^3 \rho}{1 - \rho L_{DF}(L_F)^2} =: \rho_2.$$

To shorten up the notation, we set

$$F(p) + \rho'' u' =: c''.$$

To derive a contradiction, we assume that  $B(c'', \rho'')$  is maximal empty. This is equivalent to assuming that  $\text{int} B(c'', \rho'') \cap F(S) = \emptyset$ , and thus  $B(c'', \rho'')$  is a maximal empty weakly tangent ball to  $F(p)$ . Similarly to the beginning of the proof, we now apply Theorem 2.6 to the map  $F^{-1}$  and the boundary sphere  $S(c'', \rho'') = \partial B(c'', \rho'')$ . As a result, the reach of  $F^{-1}(S(c'', \rho''))$  is at least

$$\text{rch}(F^{-1}(S(c'', \rho''))) \geq \frac{\frac{(L_F)^3 \rho}{1 - \rho L_{DF}(L_F)^2}}{(L_F)^3 + \frac{(L_F)^3 \rho}{1 - \rho L_{DF}(L_F)^2} L_{DF}(L_F)^2} = \rho.$$

We conclude that there exists a ball that is tangent to the set  $F^{-1}(S(c'', \rho''))$  at  $F^{-1}(F(p)) = p$ , whose radius is larger than  $\rho$ , and that does not contain any points of  $S$  in its interior. This contradicts the fact that the ball  $B(c, \rho)$  is maximal empty, and completes the proof of the first part of the statement.

We now prove the bounds on the distortion of the map  $\pi_{\text{ax}, S}$ . Let  $\rho' \in [\rho_1, \rho_2]$  be the radius of the maximal empty weakly tangent ball at  $F(p)$  in the direction  $u'$ , and write  $c' := F(p) + \rho' u'$  for its centre. We stress that, as a consequence of Lemma 2.3,  $c' \in \text{ax}(F(S))$ , but it is not necessarily true that  $c' \in \text{ax}(F(S))$ .

The goal is to estimate the distance between the two centres  $c = \pi_{\text{ax}, S}(p, u)$  and  $c' = \pi_{\text{ax}, S}(F(p), u')$ . Indeed, since  $c - p = \rho u$  and  $c' - F(p) = \rho' u'$ ,

$$\begin{aligned} |c - c'| &= |c - p + p - F(p) + F(p) - c'| = |\rho u + p - F(p) - \rho' c'| \\ &\leq |\rho u - \rho' u'| + |F(p) - p|. \end{aligned}$$

Due to the assumptions of the theorem,  $|F(p) - p| \leq \varepsilon_1$ . Furthermore, thanks to Claim A.2,

$$|\rho u - \rho' u'|^2 = \rho^2 + (\rho')^2 - 2\rho\rho' \cos \angle u, u' \leq \rho^2 + (\rho')^2 - 2\rho\rho' \sqrt{1 - (\varepsilon_2)^2}.$$

Recalling that  $\rho' \in [\rho_1, \rho_2]$ , we thus obtain

$$\begin{aligned} |\rho u - \rho' u'| &\leq \max \left( \sqrt{\rho^2 + (\rho_1)^2 - 2\rho\rho_1 \cos(\arcsin(\varepsilon_2))}, \sqrt{\rho^2 + (\rho_2)^2 - 2\rho\rho_2 \cos(\arcsin(\varepsilon_2))} \right) \\ &= \max \left( \sqrt{\rho^2 + (\rho_1)^2 - 2\rho\rho_1 \sqrt{1 - (\varepsilon_2)^2}}, \sqrt{\rho^2 + (\rho_2)^2 - 2\rho\rho_2 \sqrt{1 - (\varepsilon_2)^2}} \right). \end{aligned}$$

Hence,

$$|c - c'| \leq \max \left( \sqrt{\rho^2 + (\rho_1)^2 - 2\rho\rho_1 \sqrt{1 - (\varepsilon_2)^2}}, \sqrt{\rho^2 + (\rho_2)^2 - 2\rho\rho_2 \sqrt{1 - (\varepsilon_2)^2}} \right) + \varepsilon_1. \quad (11)$$

As the last step, we simplify the expression (11) (at the cost of weakening the bounds). For this, we assume that  $\rho L_{DF}(L_F)^2 \leq 1/2$ , so that

$$\rho_1 = \frac{\rho}{(L_F)^3 + \rho L_{DF}(L_F)^2} \geq \frac{\rho}{(L_F)^3} \left( 1 - \rho \frac{L_{DF}}{L_F} \right), \quad (12)$$

$$\rho_2 = \frac{(L_F)^3 \rho}{1 - \rho L_{DF}(L_F)^2} \leq \rho (L_F)^3 (1 + 2\rho L_{DF}(L_F)^2), \quad (13)$$

67 where we used that, for  $x \in [0, 1/2]$ ,  $\frac{1}{1+x} \geq 1-x$  and  $\frac{1}{1-x} \leq 1+2x$ . We note that both  $\rho_1$  and  $\rho_2$   
68 tend to  $\rho$  as  $L_F$  tends to 1 and  $L_{DF}$  tends to 0. We now consider  $|\rho_1 - \rho|$  and  $|\rho_2 - \rho|$ , and claim that

$$|\rho_1 - \rho|, |\rho_2 - \rho| \leq \rho(L_F)^3 (1 + 2\rho L_{DF}(L_F)^2) - \rho.$$

69 For  $|\rho_2 - \rho| = \rho_2 - \rho$ , the claim holds thanks to (13). To establish this for  $|\rho_1 - \rho|$  requires a small  
70 calculation:

$$\begin{aligned} |\rho_1 - \rho| &= \rho - \rho_1 \leq \rho - \frac{\rho}{(L_F)^3} \left(1 - \rho \frac{L_{DF}}{L_F}\right) && \text{(due to (12))} \\ &\leq \rho(L_F)^3 (1 + 2\rho L_{DF}(L_F)^2) - \rho && \text{(assuming the claim holds)} \\ 2\rho &\leq \rho(L_F)^3 (1 + 2\rho L_{DF}(L_F)^2) + \frac{\rho}{(L_F)^3} \left(1 - \rho \frac{L_{DF}}{L_F}\right) && \\ &&& \text{(reformulating the previous inequality)} \\ 2 &\leq (L_F)^3 + \frac{1}{(L_F)^3} + 2\rho L_{DF}(L_F)^5 - \rho \frac{L_{DF}}{(L_F)^4}, \end{aligned}$$

71 where the final inequality holds because  $x^3 + x^{-3} \geq 2$ , and  $2x^5 - x^{-4} \geq 0$ , for  $x \geq 1$ . We now  
72 consider the function

$$\begin{aligned} f(\delta) &= \rho^2 + \rho^2(1 + \delta)^2 - 2\rho^2(1 + \delta)\sqrt{1 - (\varepsilon_2)^2} \\ &= \rho^2 \left( \delta^2 + 2 \left(1 - \sqrt{1 - (\varepsilon_2)^2}\right) \delta + 2 \left(1 - \sqrt{1 - (\varepsilon_2)^2}\right) \right). \end{aligned}$$

73 The function  $f$  is a second order polynomial in  $\delta$  and because all coefficients are positive, the  
74 maximum of  $f$  on the interval  $[-\delta_m, \delta_m]$  is attained at  $\delta_m$ , that is,

$$\sup_{\delta \in [-\delta_m, \delta_m]} f(\delta) = f(\delta_m).$$

75 By combining these results, we see that

$$\begin{aligned} |c - c'| &\leq \sqrt{f((L_F)^3 (1 + 2\rho L_{DF}(L_F)^2) - 1) + \varepsilon_1} \\ &= \sqrt{\rho^2 + (\rho(L_F)^3 (1 + 2\rho L_{DF}(L_F)^2))^2 - 2\rho(\rho(L_F)^3 (1 + 2\rho L_{DF}(L_F)^2))\sqrt{1 - (\varepsilon_2)^2}} \\ &\quad + \varepsilon_1 \\ &= \rho \sqrt{1 + (L_F)^6 (1 + 2\rho L_{DF}(L_F)^2)^2 - 2(L_F)^3 (1 + 2\rho L_{DF}(L_F)^2) \sqrt{1 - (\varepsilon_2)^2}} + \varepsilon_1. \end{aligned}$$

76 Because both  $f(\delta)$  and the bound (13) are monotone in  $\rho$ , and  $\rho$  is bounded by the radius  $r$  of the  
77 bounding sphere  $S(r)$ , we conclude that

$$\begin{aligned} |c - c'| &\leq 2r \sqrt{1 + (L_F)^6 (1 + 4r L_{DF}(L_F)^2)^2 - 2(L_F)^3 (1 + 4r L_{DF}(L_F)^2) \sqrt{1 - (\varepsilon_2)^2}} + \varepsilon_1. \quad (14) \end{aligned}$$

78 For every point  $c$  in  $\text{ax}(\mathcal{S})$  we have found a point  $c'$  in  $\overline{\text{ax}(F(\mathcal{S}))}$  whose distance is bounded by (14),  
79 and therefore the one-sided Hausdorff distance between the two medial axes  $\text{ax}(\mathcal{S})$  and  $\overline{\text{ax}(F(\mathcal{S}))}$   
80 is bounded by the same quantity. Because the symmetrical formulation of the statement, the same  
81 bound holds for the Hausdorff distance.  $\square$

82 *Proof of Theorem 4.1* We denote  $L_\varphi = \text{Lip}(\phi)$ . Expressions (5), (6) and (7) of the main article  
83 yield:

$$L_\varphi \leq r\varepsilon, \quad L_{DF} = \varepsilon, \quad L_F \leq 1 + L_\varphi \leq 1 + r\varepsilon, \quad \varepsilon_1 \leq r^2\varepsilon, \quad \varepsilon_2 \leq r\varepsilon. \quad (15)$$

84 We deduce

$$r\varepsilon \leq 1/4 \implies r\varepsilon(1 + r\varepsilon)^2 \leq 1/2 \implies rL_{DF}(L_F)^2 \leq 1/2.$$

85 Thus, the conditions of Theorem 3.9 are satisfied. Next, we reformulate the inequality (3) of Theorem  
 86 3.9. The expression  $E$  under the square root at the right hand side of this inequality is:

$$E = 1 + (L_F)^6 (1 + 4rL_{DF}(L_F)^2)^2 - 2(L_F)^3 (1 + 4rL_{DF}(L_F)^2) \sqrt{1 - (\varepsilon_2)^2}.$$

87 By replacing  $L_F$  by  $1 + L_\varphi$  in  $E$ , the constants, as well as the degree-one terms in  $L_\varphi$ ,  $rL_{DF}$ , and  
 88  $\varepsilon_2$ , cancel out. More precisely,

$$E = 16r^2L_{DF}^2 + r^2\varepsilon_2^2 + 24rL_\varphi L_{DF} + 9L_\varphi^2 + \mathcal{O}(|(rL_{DF}, L_\varphi, \varepsilon_2)|^3). \quad (16)$$

89 Finally, by substituting inequalities (15) into (16), we obtain

$$E \leq 50r^2\varepsilon^2 + \mathcal{O}(r^3\varepsilon^3),$$

90 and

$$d_H(\text{ax}(\mathcal{S}), \text{ax}(F(\mathcal{S}))) \leq (1 + \sqrt{50}) r^2\varepsilon + \mathcal{O}(r^3\varepsilon^2).$$

91

□

## 92 B Federer's tubular neighbourhood lemma

93 **Lemma B.1 (Federer's tubular neighbourhood lemma, Theorem 4.8 (12) of [19])** *Let  $p \in \mathcal{S}$*   
 94 *and  $\text{lfs}(p) > 0$ . The generalized normal space to  $\mathcal{S}$  at  $p$  is characterized by the following property:*  
 95 *For any  $\rho \in \mathbb{R}$  satisfying  $0 < \rho < \text{lfs}(p)$ ,*

$$\text{Nor}(p, \mathcal{S}) = \{\lambda v \in \mathbb{R}^d \mid \lambda \geq 0, |v| = \rho, \pi_{\mathcal{S}}(p + v) = \{p\}\}.$$

96 *In particular,  $\text{Nor}(p, \mathcal{S})$  is a convex cone. The generalized tangent space  $\text{Tan}(p, \mathcal{S})$  is the convex*  
 97 *cone dual to  $\text{Nor}(p, \mathcal{S})$ .*
